# Supplementary material
Source: Springer Nature journal article supplement (https://www.springermedizin.de/resource/supplementary/12913_2009_998_MOESM2_ESM.pdf/9536102)

Overall Trajectories of Primary Care over 4 Years

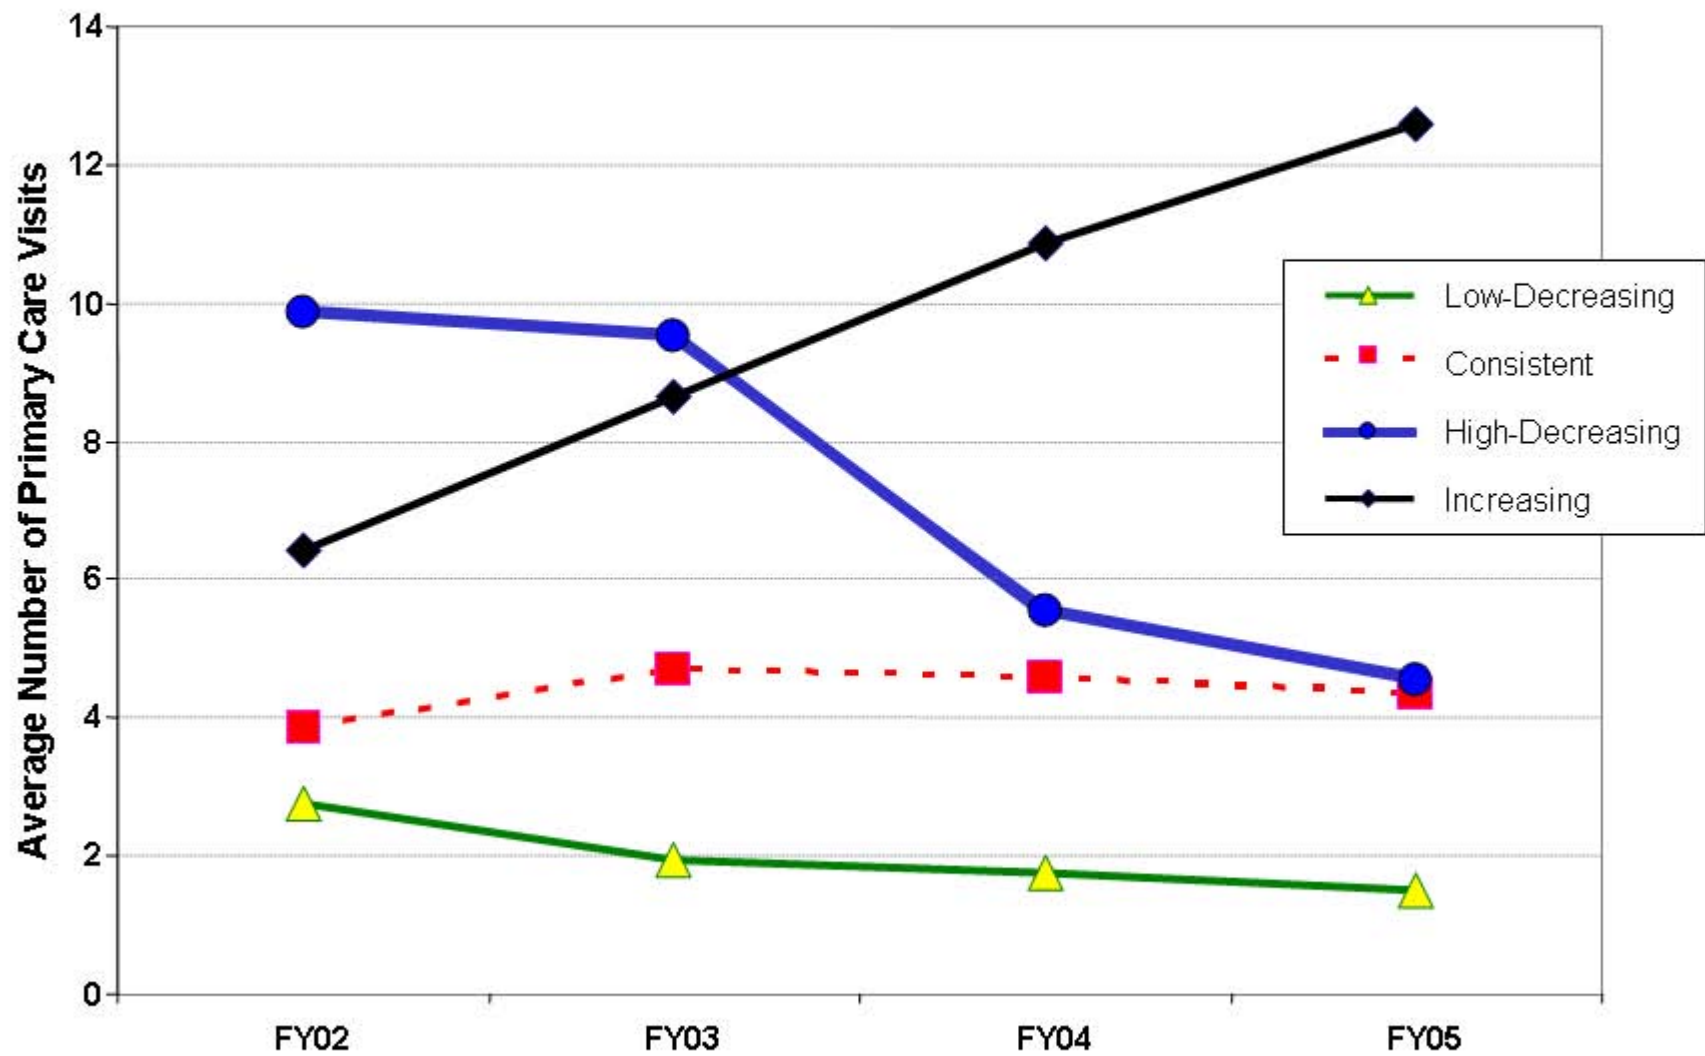

Supplement: MOESM2 [file 9536102]
